# Supplementary material for: Regulatory Role of DDX17 in Immune-Autophagy Pathways of Parkinson’s Disease Revealed by Single-Cell and Genetic Analyses
Source: Research Square preprint supplement (doi:10.21203/rs.3.rs-7047737/v1), 2025-07-21
Supplement: Supplementary file 1 [file 951df43fffed7694fb90cb28.pdf]

**Supplementary Data 1:** Single-cell quality control. (a) Before: nFeature\_RNA, nCount\_RNA, and percent.Mt; (b) After : nFeature\_RNA, nCount\_RNA, and percent.Mt.

**Supplementary Data 2:** Cell communication. (a) Cellular communication between single cell types and other cells. (b) Ligand-receptor interactions between different cell types.

**Supplementary Data 8.** Differential expression analysis of key genes and construction of nomogram. (a) Differential expression of key genes in the training set GSE22491. \*:  $P < 0.05$ ; \*\*:  $P < 0.01$ ; ns: no significance. (b) Construction of nomogram. (c) The calibration curve of the nomogram. (d) The decision curve analysis of the nomogram. (e) The receiver operating characteristic (ROC) curve of the nomogram

**Supplementary Data 9.** GSEA enrichment results of four biomarkers. The ordinate represents the enrichment fraction, and enrichment score (ES) is positive, indicating that a certain functional gene set is enriched in front of the sequencing sequence, indicating that it is positively correlated with gene enrichment. ES is negative, indicating that a certain functional gene set is enriched behind the sequencing sequence, indicating that it is negatively correlated with gene enrichment. The horizontal coordinates represent genes, and each little vertical line represents a gene. (a) SLC11a1. (b) DDX17. (c) MRAS. (d) PDIA3. (e) Protein co-expression network of four biomarkers.
